# Supplementary material
Source: Springer Nature journal article supplement (https://www.springermedizin.de/resource/supplementary/13098_2009_17_MOESM3_ESM.pdf/9670332)

**Food consumption**  
(g/day/rat)

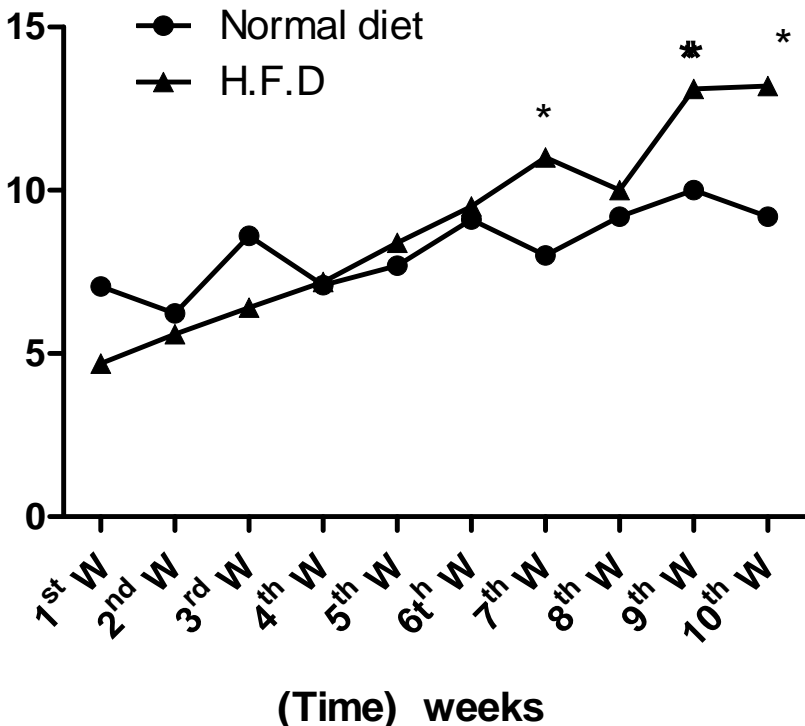

Supplement: MOESM3 [file 9670332]
